# Supplementary material for: Effects of Solid-State Fermentation with Eurotium cristatum YL-1 on the Nutritional Value, Total Phenolics, Isoflavones, Antioxidant Activity, and Volatile Organic Compounds of Black Soybeans
Source: MDPI journal article supplement (doi:10.3390/agronomy11061029), 2021-05-21
Supplement: s1 [file s1]

Archive with 1 entries (1 files):
- agronomy-1206582-supplementary.pdf
